# Supplementary material for: Towards Understanding the Microepidemiology of Lymphatic Filariasis at the Community Level in Ghana
Source: MDPI journal article supplement (doi:10.3390/tropicalmed9050107), 2024-05-07
Supplement: s1 [file s1]

# Supplementary File S1

| Study Area                                               |                          |                                                                                                                       |               |
|----------------------------------------------------------|--------------------------|-----------------------------------------------------------------------------------------------------------------------|---------------|
| 01                                                       | Region: Western          | 02                                                                                                                    | Interviewer:  |
| 03                                                       | Community:               | 04                                                                                                                    | Municipality: |
| 05                                                       | Date of Interview        |                                                                                                                       |               |
| House number:                                            |                          |                                                                                                                       |               |
| GPS Coordinates:                                         |                          |                                                                                                                       |               |
| Question                                                 |                          | Response                                                                                                              |               |
| <b>Socio-Demographic characteristics</b>                 |                          |                                                                                                                       |               |
| 1                                                        | Name of participant      |                                                                                                                       |               |
| 2                                                        | Is name in the register? | Yes<br>No                                                                                                             |               |
| 3                                                        | Age (in completed years) |                                                                                                                       |               |
| 4                                                        | Gender                   | Male<br>Female                                                                                                        |               |
| 5                                                        | Position in the family   | Male head of household<br>Female head of household<br>Child                                                           |               |
| 6                                                        | Level of Education       | No formal education<br>Primary<br>JHS<br>SHS<br>Technical/Vocational<br>Tertiary<br>Other, specify_____               |               |
| 7                                                        | Religious affiliation    | Christian<br>Muslim<br>Traditional<br>No religion<br>Other, specify_____                                              |               |
| 8                                                        | Main occupation          | Farming<br>Fishing<br>Farming + Fishing<br>Trade/Business<br>Official employee<br>Casual labor<br>Other, specify_____ |               |
| 9                                                        | Relationship status      | Single<br>Married<br>Divorced/separated<br>In a relationship but not married<br>Remarried<br>Widowed                  |               |
| <b>Knowledge Of Lymphatic Filariasis (Elephantiasis)</b> |                          |                                                                                                                       |               |

|                                |                                                                                        |                                                                                                                                                                                                                    |
|--------------------------------|----------------------------------------------------------------------------------------|--------------------------------------------------------------------------------------------------------------------------------------------------------------------------------------------------------------------|
| 10                             | Do you know or have you ever heard of LF?                                              | Yes<br>No                                                                                                                                                                                                          |
| 11                             | If yes to Q10, how did you hear of this disease?                                       | CDD<br>Disease control officer<br>Community health nurses<br>Media (TV, radio, newspapers, internet etc.)<br>Friends<br>Relatives<br>Other (specify):                                                              |
| 12                             | If No to Q10, what means of communication will make you hear about the disease faster? |                                                                                                                                                                                                                    |
| 13                             | Do you know what causes LF?                                                            | Yes<br>No                                                                                                                                                                                                          |
| 14                             | If yes to Q13, what do you think causes the disease?                                   | Mosquitoes<br>Pollution<br>Cold Weather<br>Wind<br>Poor hygiene/Dirty environment<br>Sweet foods/Sugar<br>Oily foods/peanuts<br>Rain/Standing water<br>Eggs<br>Witchcraft. curse<br>Don't know<br>Other (specify): |
| 15                             | Do you know any sign or symptom of LF?                                                 | Yes<br>No                                                                                                                                                                                                          |
| 16                             | If yes to Q14, which would you consider?                                               | High body temperature (fever)<br>Swollen scrotum<br>Swollen breasts<br>Swollen legs<br>Sores on the body<br>Don't know<br>Others (specify):                                                                        |
| 17                             | Do you think you are at risk of being infected with LF                                 | Yes<br>No                                                                                                                                                                                                          |
| <b>Compliance To Treatment</b> |                                                                                        |                                                                                                                                                                                                                    |
| 18                             | Did you know about the LF MDA campaign for LF?                                         | Yes<br>No                                                                                                                                                                                                          |

|    |                                                                                                                                                                                                    |                                                                                                                                                                                                                                                                                                                                                             |                                                                      |
|----|----------------------------------------------------------------------------------------------------------------------------------------------------------------------------------------------------|-------------------------------------------------------------------------------------------------------------------------------------------------------------------------------------------------------------------------------------------------------------------------------------------------------------------------------------------------------------|----------------------------------------------------------------------|
| 19 | If yes to Q18, how did you hear about it?                                                                                                                                                          | Radio<br>TV<br>Gongong beater<br>Poster<br>Friend/social network<br>CDD<br>Other: -----                                                                                                                                                                                                                                                                     |                                                                      |
| 20 | Did you receive any drugs during the last treatment round?                                                                                                                                         | Yes<br>No                                                                                                                                                                                                                                                                                                                                                   |                                                                      |
| 21 | If Yes to Q20, from where did you collect these drugs?                                                                                                                                             | CDD came to my house<br>I went to CDD's House<br>From the community centre<br>N/A                                                                                                                                                                                                                                                                           |                                                                      |
| 22 | If No to Q20, why not?                                                                                                                                                                             | Absent<br>Underage<br>Pregnant/breastfeeding<br>Fear of sides effects<br>Not being informed<br>CDD didn't come to house<br>Don't believe in free things<br>I was away at work<br>We do not have a CDD<br>Tired of swallowing the drug<br>Drug is not effective<br>I think I am not having the disease<br>Don't like drugs<br>Travel<br>Other, Specify _____ |                                                                      |
| 23 | If yes to Q21, did you swallow the drug?                                                                                                                                                           | Yes<br>No<br>Not applicable (did not take drug)                                                                                                                                                                                                                                                                                                             |                                                                      |
| 24 | In the last 3 MDAs (including this year), how many times have you swallowed the MDA drugs? <b>(Have the register with you and cross check the answers they give with what is in the register).</b> | <b>a) Response given</b><br>Zero<br>Once<br>Twice<br>Three times                                                                                                                                                                                                                                                                                            | <b>b) Answer in register</b><br>Zero<br>Once<br>Twice<br>Three times |
| 25 | How many other times (treatment rounds) have you previously taken the drugs?                                                                                                                       | Once<br>Twice<br>Three times<br>Four times<br>Five times<br>Six times                                                                                                                                                                                                                                                                                       |                                                                      |

|                        |                                                                            |                                                                                                                                                                                      |
|------------------------|----------------------------------------------------------------------------|--------------------------------------------------------------------------------------------------------------------------------------------------------------------------------------|
|                        |                                                                            | More than 6 times<br>Forgotten<br>Other (specify):                                                                                                                                   |
| <b>Social Networks</b> |                                                                            |                                                                                                                                                                                      |
| 26                     | Do you know anyone who has refused/stopped taking these drugs?             | Yes<br>No                                                                                                                                                                            |
| 27                     | If yes to Q26, how many people do you know?                                |                                                                                                                                                                                      |
| 28                     | If yes to Q26, what were the reason given?                                 | Fear of sides effects<br>Don't believe in free things<br>Tired of swallowing the drug<br>Drug is not effective<br>Not having the disease<br>Don't like drugs<br>Other, Specify _____ |
| 29                     | Do you know any CDD personally (is (s)he your friend)?                     | Yes<br>No                                                                                                                                                                            |
| 30                     | Are you aware how CDD's are recruited?                                     | Yes (explain)<br>No                                                                                                                                                                  |
| 31                     | Can you mention by name up to 10 close friends you have in this community? |                                                                                                                                                                                      |

#### LF Drug acceptability

|    | <i>Please rate your opinion on the following statements:</i>                         | Disagree<br>a lot | Disagree | Agree | Agree<br>a lot |
|----|--------------------------------------------------------------------------------------|-------------------|----------|-------|----------------|
| 32 | These drugs work against LF                                                          |                   |          |       |                |
| 33 | These drugs work against itching                                                     |                   |          |       |                |
| 34 | These drugs work against intestinal worms                                            |                   |          |       |                |
| 35 | I would take this treatment again                                                    |                   |          |       |                |
| 36 | I would recommend this treatment to my relatives                                     |                   |          |       |                |
| 37 | I would be willing to change my family's routine so that we took the treatment again |                   |          |       |                |
| 38 | I liked this treatment                                                               |                   |          |       |                |

|    |                                                               |  |  |  |  |
|----|---------------------------------------------------------------|--|--|--|--|
| 30 | This treatment is a good way to help our health problems here |  |  |  |  |
| 40 | Overall, this treatment will help my community                |  |  |  |  |
